# Supplementary material for: Antisense regulation by transposon-derived RNAs in the hyperthermophilic archaeon Sulfolobus solfataricus
Source: PubMed Central journal article supplement (PMC3674436; doi:10.1038/embor.2013.47), 2013-04-12
Supplement: embor201347s1.pdf [file embor201347s1.pdf]

## Supplementary Information

### Methods

#### Construction of Plasmids

Plasmid pMJ05-1183 was constructed as follows. The 3'UTR of ORF 1183 (bp 1075 to bp 1557) was amplified by PCR from *Sulfolobus solfataricus* (Sso) genomic DNA. The PCR product obtained with the forward primer 5'-CCGGGGGCCCCGGAATAACCCCAACCC-3', which contained an *Apal* site (underlined) and the reverse primer 5'-GGCCCGGCCGCCTAAGGTGCAATCATTTGC-3', which contained an *Eco52I* site (underlined), was cleaved and ligated into the corresponding sites of plasmid pSVA5 [1], resulting in plasmid pSVA5-1183. Plasmid pSVA5-1183 was then cleaved with *Eco52I* and *XmaJI* and the resulting fragment was ligated into the corresponding sites of plasmid pMJ05 [2], giving rise to plasmid pMJ05-1183.

For plasmid pMJ05-1183R26 the sequence 5'-CTTGGAATATCACGGATGTG-3' (bp 1097 to bp 1122 of Sso1183) was replaced with the sequence 5'-TCACATCCGTGATATTCGTATATGAG-3'. The Sso1183-3'UTR with the replaced sequence flanked by *Apal* and *Eco52I* restriction sites was synthesized resulting in plasmid pCR2.1-1183R26 (Eurofins). Plasmid pCR2.1-1183R26 was cleaved with *Apal* and *Eco52I*, and the fragment was ligated into the corresponding sites of plasmid pSVA5 [1], resulting in plasmid pSVA5-1183R26. Plasmid pSVA5-1183R26 was then cleaved with *Eco52I* and *XmaJI* and the resulting fragment was ligated into the corresponding sites of plasmid pMJ05, resulting in plasmid pMJ05-1183R26.

For plasmid pMJ05- $\Delta$  the sequence 5'-CCCAACCCACACCCTTGGAATATCACGGATGTGAGGAAAACCGCACATCTT-3' (bp 1084 to bp 1144 in 1183) was replaced with sequence 5'-TTGGCTTTTGGTCAGAACGAATATCACCCCTCTCAAATTCCAGGGCTGGTGTA-3' resulting in a shorter transcript. For PCR mutagenesis the primers 5'-TTTGGGCCCGGAATAATTGGCTTTTGGTCAGAACGAATATCACCCCTCTCAAATTCCAGGGCTGGTGTAAGAGATAAATATTCAGTGAAGCATTCAATTG-3' and 5'-GGCCCGGCCGCCATGGAGGTGAAGAGGGCTAAGGTGCAATCATTTG-3' were used with chromosomal Sso DNA as template. The 482 bp PCR-product of the Sso 1183-3'UTR with the replaced sequence was cleaved with *Apal* and *Eco52I*, and ligated in the corresponding sites of plasmid pSVA5 [1], resulting in plasmid pSVA5-

$\Delta$ . Plasmid pSVA5- $\Delta$  was then cleaved with *Eco52I* and *XmaJI* and the fragment obtained was ligated into the corresponding sites of plasmid pMJ05, resulting in plasmid pMJ05- $\Delta$ .

For Plasmid pMJ05-6545-1183 an overlap PCR was performed using oligonucleotide 5'-CATGCCATGGATTTTTTGGCAGAAACAGCGC-3' together with 5'-GGTTGGGGTTATTCCGCTAAGAAGTTTGTAGAGGAG-3' and oligonucleotide 5'-CTCCTCTACAACTTCTTAGCGGAATAACCCCAACC-3' together with 5'-CGCGGATCCAGGTGAAGAGGGCTAAG-3' and genomic DNA as template. The second PCR was performed using the annealed PCR products as template with oligonucleotides 5'-CATGCCATGGATTTTTTGGCAGAAACAGCGC-3' containing a *NcoI* site and 5'-CGCGGATCCAGGTGAAGAGGGCTAAG-3' containing a *BamHI* site. The PCR product was cleaved and ligated into the corresponding sites of plasmid pSVA5 [1], resulting in plasmid pSVA5-6454-1183. Plasmid pSVA5-Sso6454-1183 was then cleaved with *Eco52I* and *XmaJI* and the resulting fragment was ligated into the corresponding sites of plasmid pMJ05 [2], which gave rise to plasmid pMJ05-6545-1183.

## Transformation of Sso

100–150 ng of the respective plasmid DNA was used for electroporation of exponentially grown *S. solfataricus* PH1-16 ( $\Delta$ *pyrEF*;  $\Delta$ *lacS*) as described in [2]. The cells were regenerated in medium containing uracil, and then selected in medium without uracil. After reaching an OD<sub>600</sub> of 0.5, the cells were plated and single colonies were inoculated in liquid media without uracil. Genomic DNA was isolated and the presence of the respective plasmids was confirmed using the pMJ05 specific primers 5'-GGATGCTAAACAACACTATTCAAACCTG-3' and 5'-GTTGTGTGGAATTGTGAGCGGATAA-3'.

## Phosphate limiting conditions

The strains P2, PH1-16(pMJ05), PH1-16(pMJ05-1183), PH1-16(pMJ05-1183R26), PH1-16(pMJ05- $\Delta$ ), PH1-16(pMJ05-6545-1183) were grown in Brock's medium to an OD<sub>600</sub> of 0.6, composed of Brock's salts (final concentration of 280 mg / l KH<sub>2</sub>PO<sub>4</sub>) supplemented with 0.2 % NZamine and 0.2 % glucose or arabinose. The cells were pelleted and washed before dilution to OD<sub>600</sub> of 0.1 into Brock's medium without addition of KH<sub>2</sub>PO<sub>4</sub> in 200 x Brock medium. After the cells reached an OD<sub>600</sub> of 0.5,

the cells were diluted again in Brock's medium without  $\text{KH}_2\text{PO}_4$  to an  $\text{OD}_{600}$  of 0.1. The cells were harvested when they reached an  $\text{OD}_{600}$  of 0.6 followed by extraction of total RNA (see below).

## RT-PCR

Total RNA was isolated as described [3] and DNase I treated. cDNA was synthesized from 1  $\mu\text{g}$  of total RNA using random hexamer oligos (Fermentas) and SuperScriptIII Reverse Transcriptase (Invitrogen). For RT-PCR, 10 ng or 500 ng cDNA from strains PH1-16(pMJ05), PH1-16(pMJ05-1183), PH1-16(pMJ05-1183R26), PH1-16(pMJ05- $\Delta$ ), PH1-16(pMJ05-6545-1183) grown in either full medium (+P) or under phosphate limiting conditions (-P) was used as template in a PCR reaction with 30 cycles using GoTAQ Mastermix (Promega), and either the *lacS* (Sso 3019) specific oligonucleotides (5'-ATGTA~~CT~~CATTTC~~CA~~AATAGC-3' and 5'-ATCTCTACCGCTTCCATATCTTTATCCGT-3'), the 6454-1183 specific primers (5'-GATACAAAGTGATGGTAGTGG-3' and 5'-GTGGGTTTGTATCTCGAAAG-3') and the RNA-257<sub>1</sub> specific oligonucleotides (5'-GTGGGTTTCGCACTAGACCTC-3' and 5'-CTTAGTGGGTTTGGGCTTCA-3'). As internal / loading controls the abundance of Sso 0412 mRNA, encoding the aIF2 gamma subunit, and that of 5S ribosomal RNA was determined. The Sso 0412 specific primers (5'-AGCCCAAGTTTCTGAGACGA-3' and 5'-TGCGATAACGCTTCCTCTTT-3'), and the 5S rRNA specific oligonucleotides 5'-CCACCCGGTCACAGTG-3' and 5'-CCCATCCCAGCTTAGTG-3' were used. The PCR products were separated on 6% polyacrylamide gels and the signals were quantified using Image J software.

## qPCR

Total RNA was isolated as described [3] and DNase I treated. cDNA was synthesized from 1  $\mu\text{g}$  of total RNA using random hexamer oligos (Fermentas) and SuperScriptIII Reverse Transcriptase (Invitrogen). For qPCR 10 ng cDNA from wildtype strain P2 and strains PH1-16(pMJ05), PH1-16(pMJ05-1183), PH1-16(pMJ05-1183R26), PH1-16(pMJ05- $\Delta$ ), grown in either full medium (+P) or under phosphate limiting conditions (-P) was used as template. The cDNA was RNase H treated and qPCR analysis was performed with RNA-257<sub>1</sub> specific primers (5'-GTGGGTTTCGCACTAGACCTC-3' and 5'-CTTAGTGGGTTTGGGCTTCA-3'), Sso 3019 (*lacS*) specific primers (5'-GGAAGCGGTAGAGATGGCTG-3' and 5'-CATCCGTGACCGTAACCTCC-3') and the Sso

1183 specific primers (5'-TGATGACGTTTGGAGCGTTA-3' and 5'-CAAAGCCCCAGAATAGTCCA-3'). The primers were designed with Primer 3 software (<http://frodo.wi.mit.edu/primer3>). As internal standard for the cDNA amount Sso 0412 specific primers (5'-AGCCCAAGTTTCTGAGACGA-3' and 5'-TGCGATAACGCTTCCTCTTT-3') were used. The real-time PCR mixture containing 2 x iQ SYBR green Supermix (Biorad) or 5x HOT FIREPol EvaGreen® qPCR Mix (Medibena), 10 ng cDNA and 250 nM of each primer was placed in a Real-time PCR cyclor (Eppendorf Mastercycler) and the reaction was started at 95°C for 3 min or 15 min, followed by 40 cycles of 25s at 95°C, 20s at 58°C and 20s at 72°C. All reactions including the DNA standards and the negative control (no template) were done in triplicate. The fluorescence was measured at the last step of each cycle. After 40 cycles, a melting curve analysis was performed by raising the temperature from 45°C to 95°C every 15s, and by measuring the fluorescence at each cycle. The quantification was made using the software realplex 2.2 from a standard curve generated by titration of 10<sup>1</sup>-10<sup>6</sup> copies of linearized plasmid pSAV5 harboring either the full length RNA-257<sub>1</sub> gene, Sso 3019, Sso 1183 or Sso 0412.

### ***In vitro* RNA transcription**

The PCR-templates for synthesis of 1183 mRNA and the 1183 3'UTR were prepared by using genomic Sso DNA as template together with the oligonucleotides 5'-CGGGATCCTAATACGACTCACTATAGGATGAATGTAAAGAACGTATTC-3' (1183 mRNA) and 5'-CGGGATCCTAATACGACTCACTATAGGCCAGGTGGACTTATAGCTCTCAC-3' (1183 3'UTR) containing a T7 Promotor (underlined) and the reverse primer 5'-CGGAATTCGGATGCTAATGACTCTCTTTTCG-3'. For RNA-257<sub>1</sub> primer 5'-CGGGATCCTAATACGACTCACTATAGGGTGAAGTGAACACACACCTC-3' and primer 5'-CGGAATTCCTTACTTAGTGGGTTTGGGC-3' were used. For transcription of the Sso 3148 3'UTR, the primers 5'-TAATACGACTCACTATAGGATGAACTCCATACTGATGACG and 5'-GAACTCCATACTGATGACGG-3' were used. For transcription of the lacS'-3'UTR-1183 we used plasmid pMJ05-1183 as template together with the oligonucleotides 5'-TAATACGACTCACTATAGGGTGAAGTGAACACACACCTC-3' (complementary to nts 887-907 of lacS) containing a T7 Promotor (underlined) and 5'-GGCCCGGCCGCCATGGAGGTGAAGAGGGCTAAGGTGCAATCATTTG-3'

(complementary to the 1183 3'UTR) resulting in a 5' deletion of *lacS* mRNA (*lacS'*) containing 584 nts of the coding region fused to the 1183 3'UTR.

## Preparation of S30 Extracts

200 ml of a *Sso* culture ( $OD_{600} = 0.4$ ) was harvested, washed and resuspended in buffer A (20 mM Tris / HCl pH 7.0; 10 mM Mg-acetate; 40 mM  $NH_4Cl$ ; 1 mM DTT). The cells were lysed by snap freezing in liquid nitrogen followed by thawing at 37°C using 4 repetitions. The lysate was centrifuged at 30.000 x g for 30 min at 4°C. The S30 extract was adjusted to an  $OD_{280}$  of 30  $\mu g / \mu l$  with buffer A and supplemented with glycerol to a final concentration of 10 %.

## $\beta$ -galactosidase assay

At an  $OD_{600}$  of 0.6, 2 ml cultures of strains PH1-16 (pMJ05), PH1-16 (pMJ05-1183), PH1-16(pMJ05-1183R26) and PH1-16 (pMJ05- $\Delta$ ) growing either in Brock's medium or under phosphate limiting conditions (see above) were harvested and the cell-pellets were resuspended in 50  $\mu l$  10 mM Tris / HCl pH 8.0. Crude cell extracts were prepared by placing the cells 4 times in liquid nitrogen and then for 5 min at 37 °C. The extract was centrifuged for 30 min at 10.000 x g. To 50  $\mu l$  of the supernatant 950  $\mu l$  of pre-heated reaction buffer (50 mM sodiumphosphate pH 6.5, 4 mg / ml ONPG) were added and the mixture was incubated for 30 min at 70°C. After incubation, the  $OD_{420}$  was measured and the Miller units were calculated following the standard protocol.

## REFERENCES

1. Albers, S.V., Jonuscheit, M., Dinkelaker, S., Urich, T., Kletzin, A., Tampe, R., Driessen, A.J., and Schleper, C. (2006). Production of recombinant and tagged proteins in the hyperthermophilic archaeon *Sulfolobus solfataricus*. *Appl Environ Microbiol* **72**, 102-111.
2. Jonuscheit, M., Martusewitsch, E., Stedman, K.M., and Schleper, C. (2003). A reporter gene system for the hyperthermophilic archaeon *Sulfolobus solfataricus* based on a selectable and integrative shuttle vector. *Mol Microbiol* **48**, 1241-1252.
3. Chomczynski, P., and Sacchi, N. (1987). Single-step method of RNA isolation by acid guanidinium thiocyanate-phenol-chloroform extraction. *Anal Biochem* **162**, 156-159.

**A**

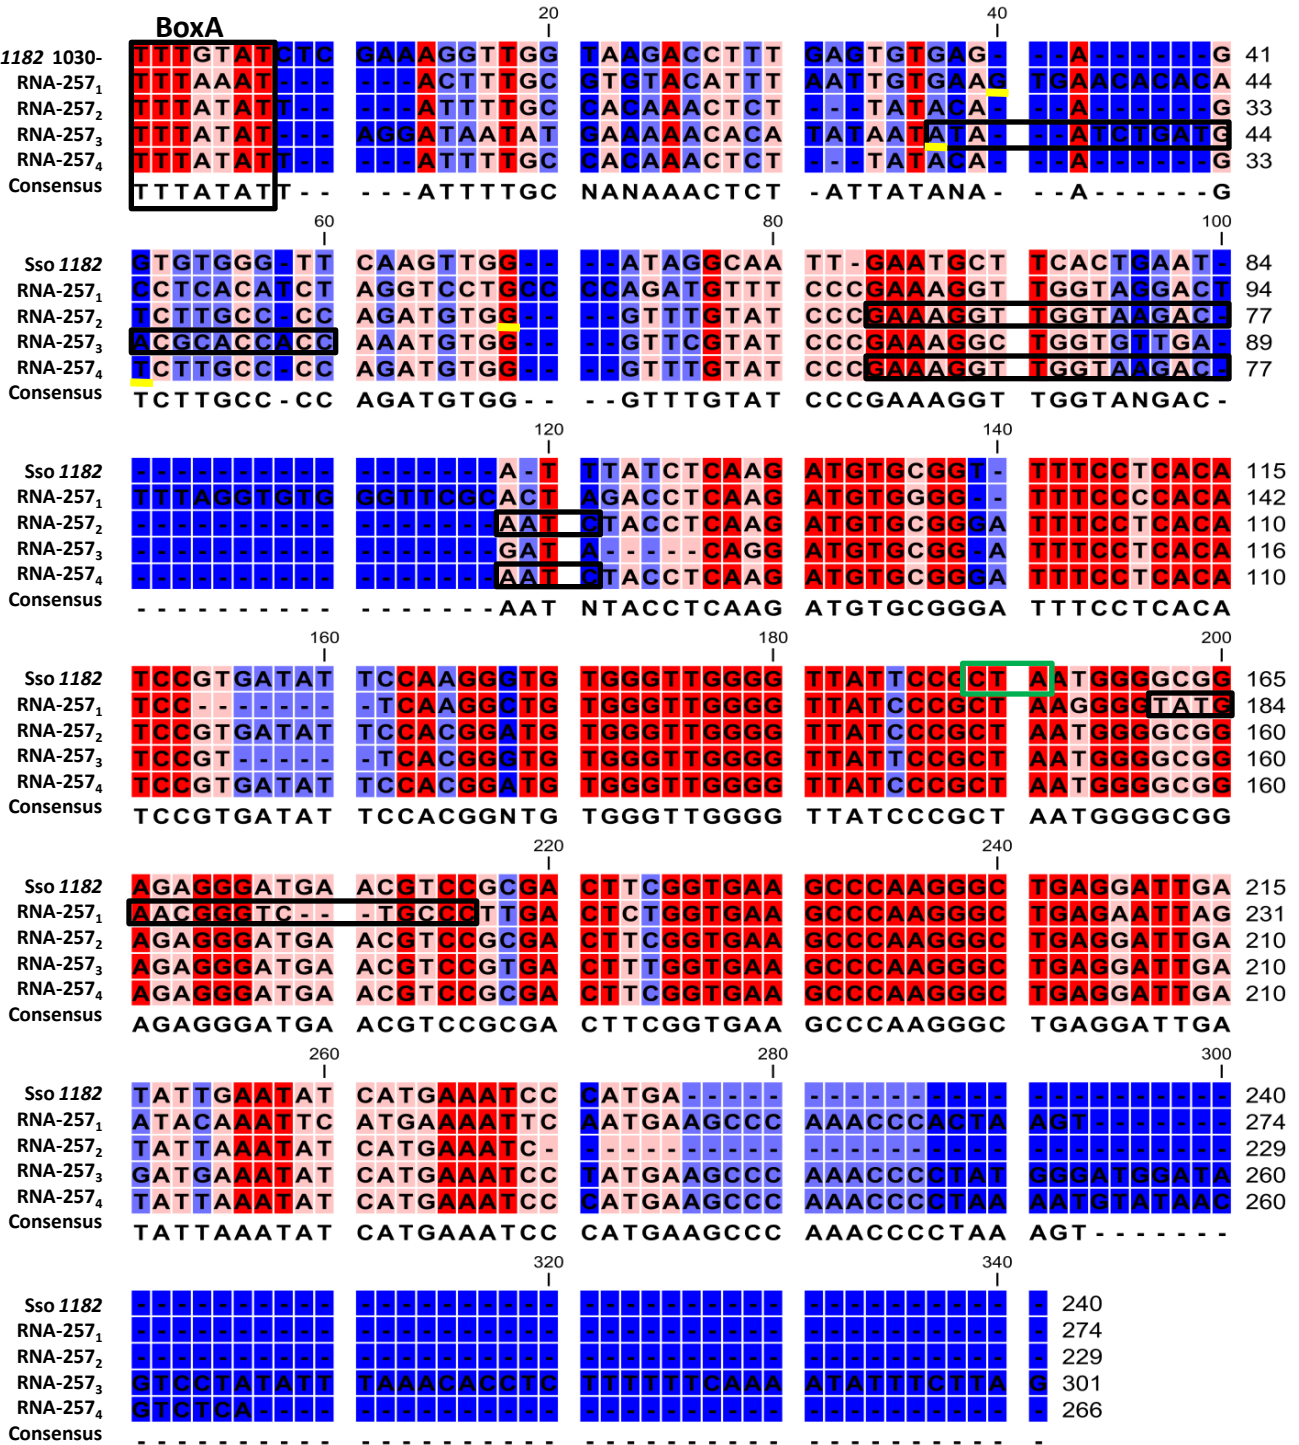

**B**

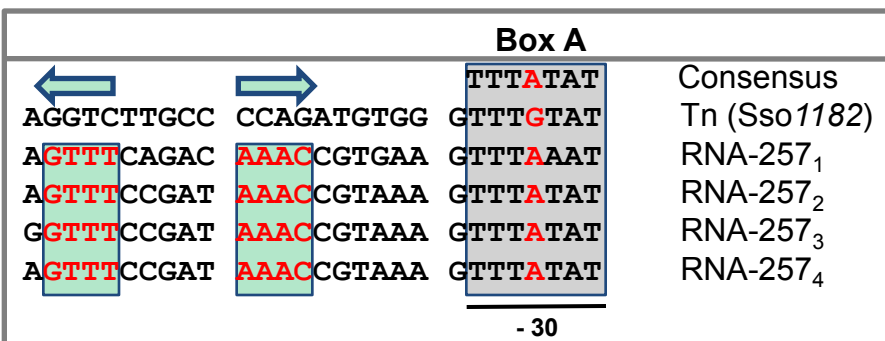

**C**

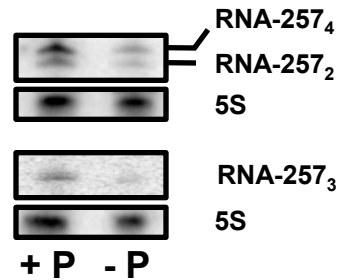

**D**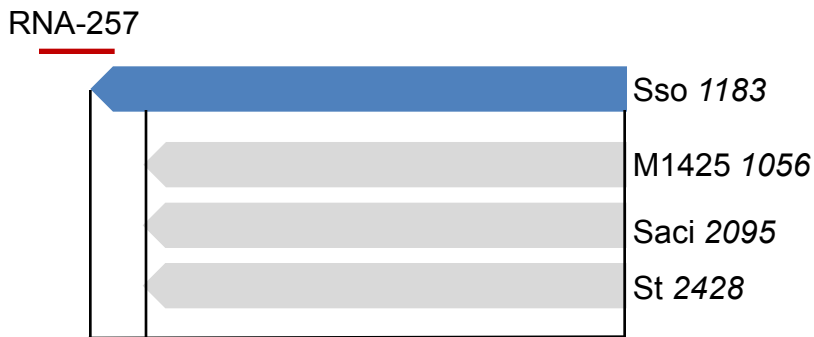

**Fig S1 (A)** Alignment of the 3' end of Sso ORF 1182 (from bp 1030 to bp 1269), RNA-257<sub>1</sub> and the 3' paralog RNAs, RNA-257<sub>2-4</sub> (RNA-107, RNA-91 and RNA-20). The RNA-257<sub>1-4</sub> paralogs differ in length but possess a highly conserved core (red) of approx. 100 nt (70-90 % identity) and show an overall sequence identity of >50 %. The alignment was performed using CLC sequence viewer software. The Box A promoter region is highlighted with a black box. The 5' end of RNA-257<sub>1</sub> (was mapped by a circularization approach; not shown.) and that of RNA-257<sub>2-4</sub> [12] are underlined in yellow. The green box depicts the stop codon of Sso ORF 1183 encoded on the opposite DNA strand. The black box denotes the binding site for the RNA-257<sub>1</sub>, RNA-257<sub>2</sub>, RNA-257<sub>3</sub> and RNA-257<sub>4</sub> specific probes used for Northern-blot analyses. **(B)** Promoter region of RNA-257<sub>1-4</sub> paralogs and the corresponding sequence in Sso ORF 1182. Note that the sub-sequence in Sso ORF 1182 deviates from the Box A consensus sequence by the presence of a G. The inverted repeat located upstream of the Box A promoter region (approx. 30 bp) is highlighted in green. **(C)** Determination of the RNA-257<sub>2</sub>, RNA-257<sub>3</sub> and RNA-257<sub>4</sub> levels by Northern-blot analyses using total RNA of Sso grown in either full medium (+P) or under phosphate limiting conditions (-P). 5S rRNA was used as loading control. **(D)** Analysis of Sso 1183 orthologous genes in 3 different Sulfolobales; *S. islandicus* (M1425 1056); *S. acidocaldarius* (Saci 2095); *S. tokodaii* (St 2428). The last 90 nucleotides of Sso ORF 1183 share homology only with the transposase sequence (3' end of ORF 1182) and not with the putative phosphate transporter genes of M1425 (1056); Saci (2095) or St (2428), i.e. the base-pairing region (bar) for RNA-257<sub>1-4</sub> with the 3' end and the 3'UTR of 1183 is only present in Sso.

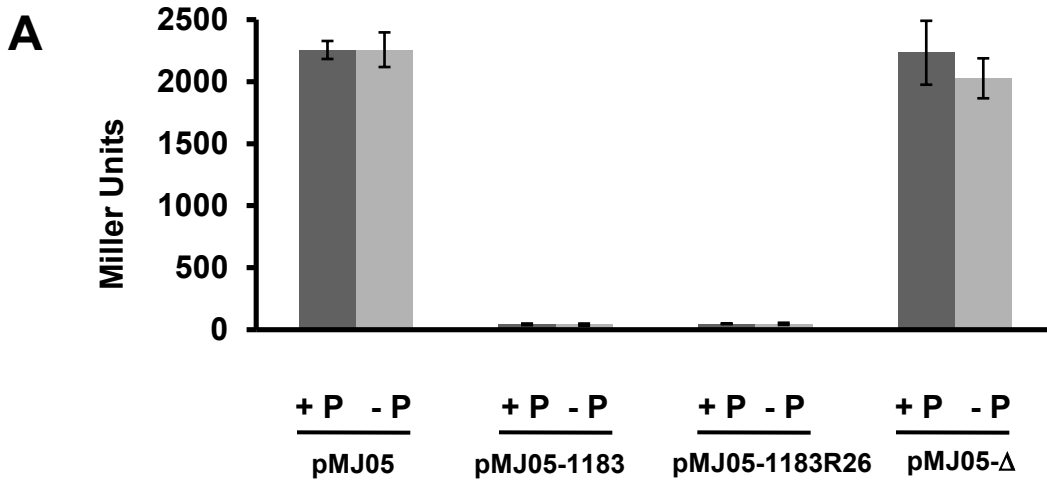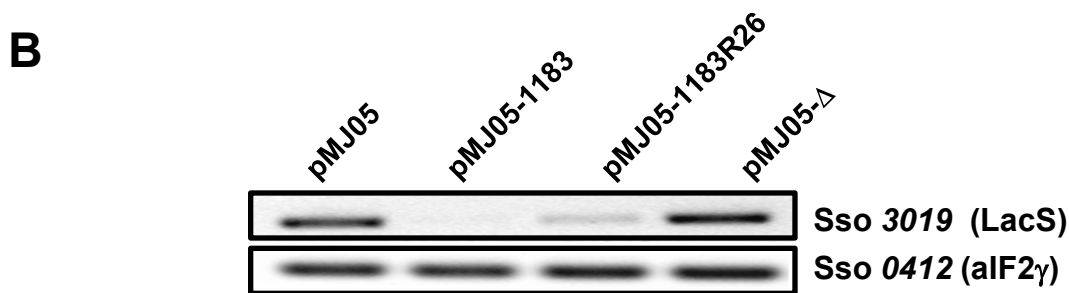

**Fig S2 (A)** β-Galactosidase activity determined in crude cell extracts of strains Sso PH1-16(pMJ05), Sso PH1-16(pMJ05-1183), Sso PH1-16(pMJ05-1183R26) and Sso PH1-16(pMJ05-Δ) grown in Brock's medium (+P) and under phosphate limiting conditions (-P). The error bars represent standard deviations. **B)** RT-PCR performed with 10 ng cDNA obtained from strains PH1-16(pMJ05), PH1-16(pMJ05-1183), PH1-16(pMJ05-1183R26) and PH1-16(pMJ05-Δ) with *lacS* or *Sso 0412* (house-keeping endogenous control) specific primers. The experiment was performed in triplicate. The result of one representative experiment is shown.



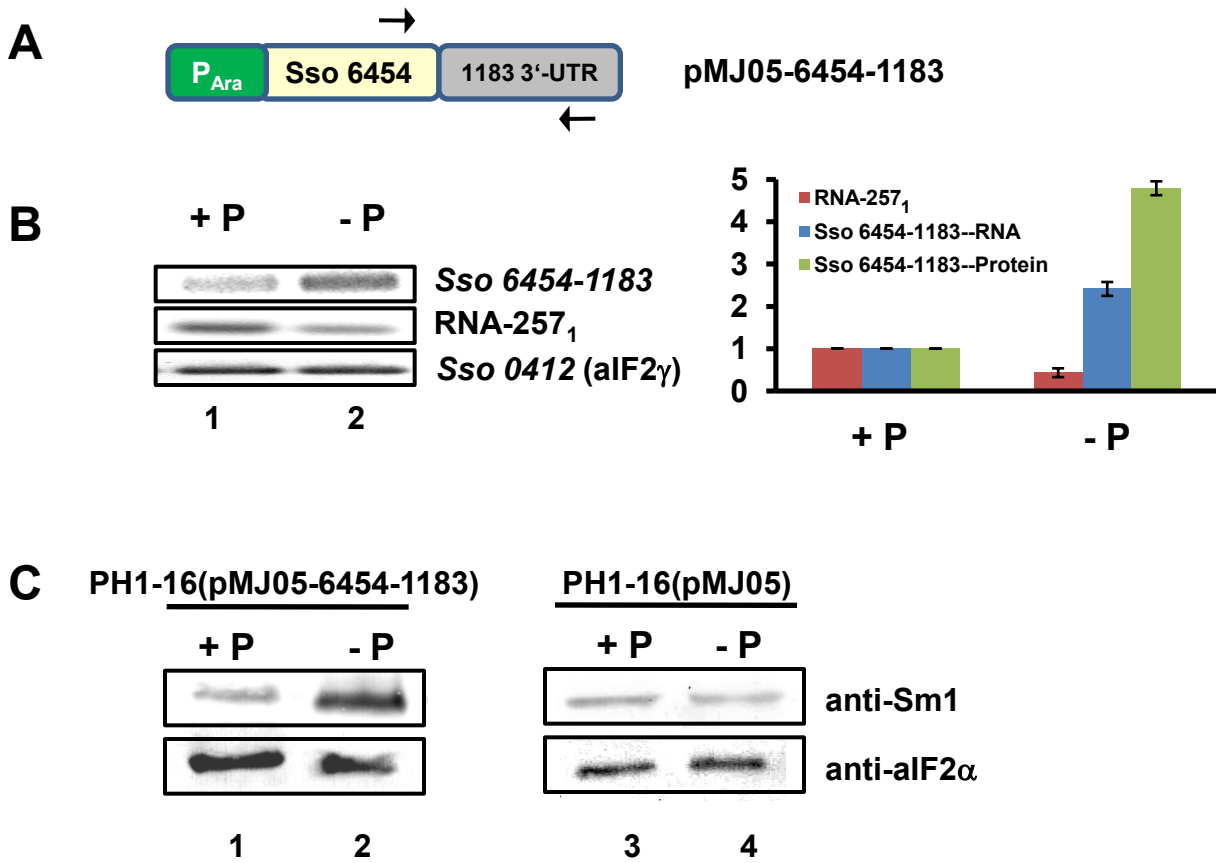

**Fig S3 (A)** Schematic depiction of the *Sso 6454-3'UTR-1183* gene fusion. The arrows depict the binding positions of the oligonucleotides used for RT-PCR. **(B)** RT-PCR with cDNA derived from strain PH1-16(pMJ05-6454-1183) grown in full medium (+P; lane 1) and under phosphate limiting conditions (-P; lane 2), respectively, using oligonucleotides specific for the *Sso 6454-1183* fusion, RNA-257<sub>1</sub> and *Sso 0412* (house-keeping endogenous control). The experiment was performed in triplicate. The result of one representative experiment is shown. Right panel: Graphic representation of the levels of the RNA-257<sub>1</sub> transcript (see B; red), the *Sso 6454-1183* transcript (see B; blue) and of the *Sso 6454-1183* protein (Sm protein; see C; green) from three independent experiments using Image J software. The values for “+P” was set to 1; the error bars represent standard deviations. **(C)** *Sso* strain PH1-16(pMJ05-6454-1183) was grown in full medium (+P; lane 1) and under phosphate limiting conditions (-P; lane 2), respectively. Lanes 3 and 4, *Sso* strain PH1-16(pMJ05) (control) was grown in full medium (+P; lane 3) and under phosphate limiting conditions (-P; lane 4), respectively. The quantitative western-blot analyses were performed with anti-Sm1 antibodies and anti-aIF2 $\alpha$  antibodies (internal control) following standard procedures.

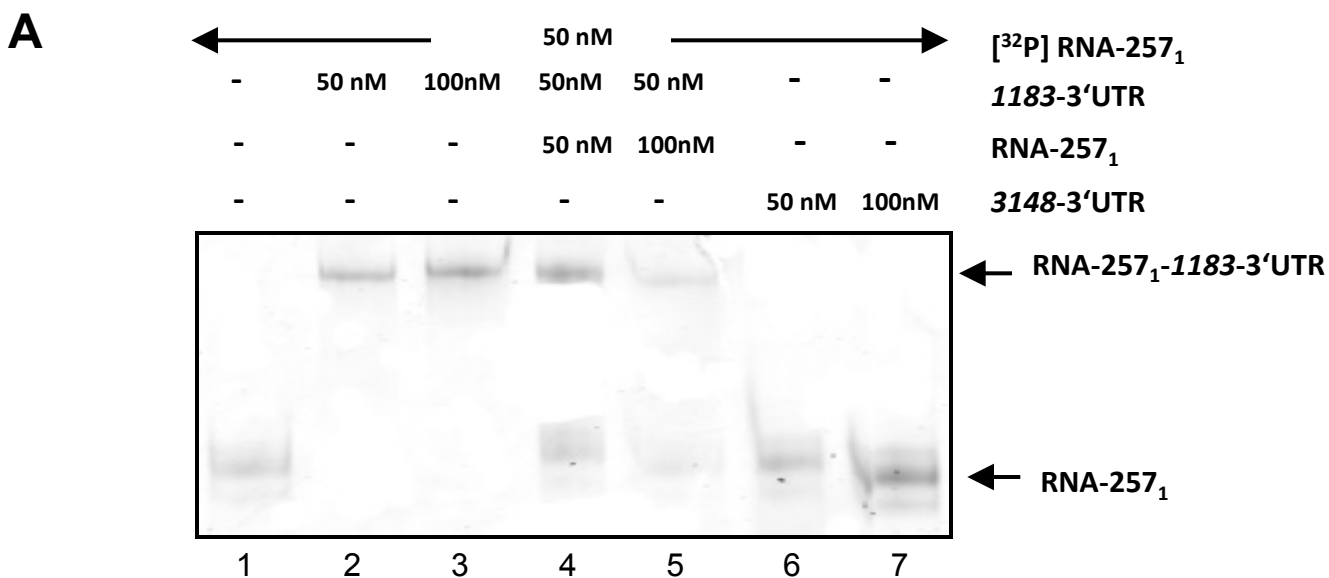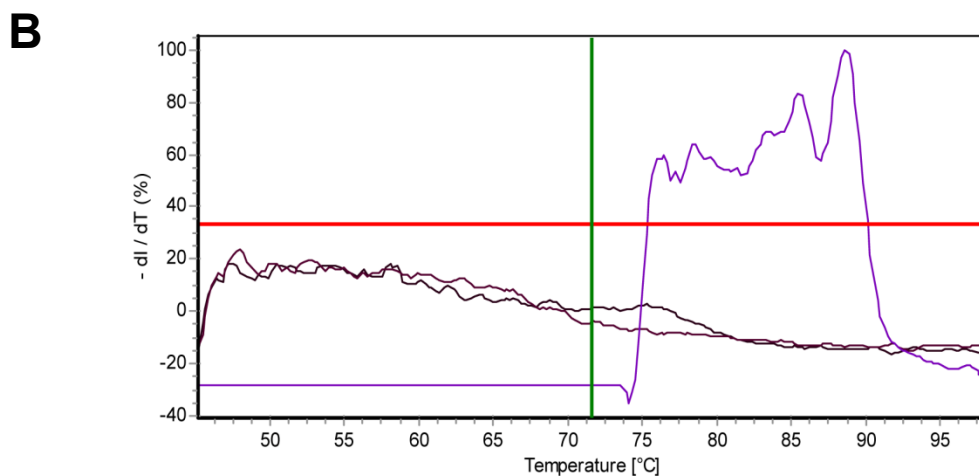

**Fig S4 (A)** Duplex formation of RNA-257<sub>1</sub> with the 3' end and 3' UTR of ORF 1183 (1183-3' UTR) determined by electrophoretic mobility shift assays. The [<sup>32</sup>P] labelled and unlabelled RNA-257<sub>1</sub> as well as the ORF 1183-3'UTR and the 3'UTR of ORF 3148 (negative control) were transcribed *in vitro* and gel-purified. The radiolabeled RNA-257<sub>1</sub> was incubated at 75 C for 5 min alone (lane 1), together with the 1183-3'UTR (lanes 2-5) in the absence (lanes 2-3) or presence (lanes 4-5) of unlabeled RNA-257<sub>1</sub>, and together with 3148-3'UTR (lanes 6-7), respectively. The RNAs were then subjected to native gel electrophoreses. The signals for RNA-257<sub>1</sub> and the RNA-257<sub>1</sub>-1183-3'UTR duplex are indicated at the right by arrows. **(B)** The melting curve was established by using an Eppendorf mastercycler and 5 x qPCR mix (Medibena). 30 pmol *in vitro* transcribed RNA-257<sub>1</sub> (purple graph below red threshold), 1183-3' UTR alone (black graph) or 30 pmol RNA-257<sub>1</sub> together with 30 pmol of 1183-3' UTR (purple graph) were denatured for 5 min at 95 C. The melting curve analysis was performed by raising the temperature from 45°C to 98°C within 30 min, and by continuously measuring the fluorescence.
